1 **Coordinated host-pathogen transcriptional dynamics revealed using sorted subpopulations and**  
2 **single, *Candida albicans* infected macrophages**

3  
4 José F. Muñoz<sup>1,\*</sup>, Toni Delorey<sup>1,2,\*</sup>, Christopher B. Ford<sup>1</sup>, Bi Yu Li<sup>1</sup>, Dawn A. Thompson<sup>1</sup>, Reeta P.  
5 Rao<sup>1,2,#</sup>, Christina A. Cuomo<sup>1,#</sup>

6  
7 <sup>1</sup>Broad Institute of MIT and Harvard, Cambridge, MA USA. <sup>2</sup>Worcester Polytechnic Institute, Worcester,  
8 MA USA.

9 \*These authors contributed equally to this work

10 #Corresponding authors: Christina A. Cuomo [cuomo@broadinstitute.org](mailto:cuomo@broadinstitute.org); Reeta P. Rao [rpr@wpi.edu](mailto:rpr@wpi.edu)

11  
12  
13 **Abstract**

14 The control of fungal infections depends on interactions with innate immune cells including  
15 macrophages, which are among the first host cell types to respond to pathogens such as *Candida*  
16 *albicans*. This fungus is a member of the healthy human microbiome, although also a devastating  
17 pathogen in immunocompromised individuals. Consistent with recent findings from studies of other  
18 pathogens, we observed that within a population of interacting macrophages and *C. albicans*, there are  
19 distinct host-pathogen subpopulations reflecting cell specific trajectories and infection outcomes. Little  
20 is known about the molecular mechanisms that control these different fates. To address this, we  
21 developed an experimental system to isolate the major host-fungal pathogen subpopulations observed  
22 during *ex vivo* infection using fluorescent markers. We separated subpopulations of macrophages  
23 infected with live *C. albicans* from uninfected cells and assessed the variability of gene expression in  
24 both host and fungal pathogen for each subpopulation across time using RNA-Seq. In infected cells, we  
25 observed a coordinated, time-dependent shift in gene expression for both host and fungus. The early  
26 response in macrophages was established upon exposure to *C. albicans* prior to engulfment and  
27 involved up-regulation of pathways and regulatory genes required for cell migration, pathogen  
28 recognition, activation of engulfment, and phagocytosis; this pro-inflammatory response declined during  
29 later time points in parallel with expression changes in *C. albicans*. After phagocytosis, the initial  
30 response of *C. albicans* was to up-regulate genes related to survival in the nutrient-limited and stressful  
31 environment within macrophages; at later time points, gene expression shifted to initiate hyphal growth  
32 and escape. To further probe the heterogeneity seen observed in host-pathogen interactions, we  
33 performed RNA-Seq of single macrophages infected with *C. albicans*. We observed that some genes  
34 show higher levels of heterogeneity in both host and fungal pathogen cells that we could not detect in  
35 subpopulation samples; we observed that the time shift in expression is asynchronous and that  
36 expression changes in both the host and pathogen are tightly coupled. This work highlights how

37 analysis of subpopulations and single host-pathogen pairs can resolve population heterogeneity and  
38 trace distinct trajectories during host interactions with fungal pathogens.

39

## 40 **Introduction**

41

42 Interactions between microbial pathogens and the host innate immune system are critical to  
43 determining the course of infection. Phagocytic cells, including macrophages and dendritic cells, are  
44 key players in the recognition of and response to infection by fungi<sup>1</sup>. *Candida albicans*, the most  
45 common fungal pathogen, can cause life threatening systemic infections in immunocompromised  
46 individuals; however, in healthy individuals, *C. albicans* can be found as a commensal resident of the  
47 skin, gastrointestinal system, and urogenital tract<sup>2</sup>. In addition, *C. albicans* can withstand harsh host  
48 environments, including in response to macrophage engulfment by regulating metabolic pathways and  
49 cell morphology<sup>3,4</sup>. While macrophages directly control fungal proliferation and coordinate the response  
50 of other immune cells, the outcomes of these interactions are heterogeneous; some *C. albicans* cells  
51 survive within and kill macrophages upon escape, some cells lyse in the phagosome and other cells  
52 may evade direct host cell interaction or phagocytosis<sup>5</sup>.

53

54 Previous studies of *C. albicans* and immune cell interactions in bulk, non-sorted populations have  
55 identified key pathways by characterization of either the fungal or host transcriptional response during  
56 these interactions<sup>3,6,7</sup>. More recently, dual transcriptional profiling of host-fungal pathogen interactions  
57 have examined populations of cells, which measures the average the transcriptional signal of millions of  
58 cells which may include diverse infection fates<sup>8-11</sup>. In addition, even in a clonal population of  
59 phagocytes, many immune cells may not engulf any fungal cells, while others can phagocytose up to  
60 ten fungal cells<sup>12</sup>. The maturation of single-cell RNA sequencing technologies has demonstrated that  
61 substantial variation in gene expression between cells can be detected within stimulated or infected  
62 immune cell populations<sup>13-15</sup>. For example, single-cell RNA-seq revealed how variability in infection  
63 leads to expression bimodality of the interferon-response among single macrophages that were  
64 exposed to LPS or *Salmonella*<sup>14</sup>. A recent study measured both host and pathogen gene expression in  
65 parallel, in single host cells infected with the bacteria *S. typhimurium*; however, as sufficient coverage of  
66 pathogen transcriptomes was difficult to recover, pathogen transcriptional data was pooled prior to  
67 analysis<sup>16</sup>. To date, parallel transcriptional profiling of single host cells and fungal pathogens has not  
68 been reported.

69

70 To overcome these challenges, we developed an experimental system to isolate subpopulations of  
71 distinct infection outcomes and examined host and pathogen gene expression in parallel, in sorted  
72 subpopulations and in single, infected macrophages. We have focused on four distinct infection  
73 outcomes: (i) macrophages infected with live *C. albicans*, (ii) macrophages infected with dead *C.*  
74 *albicans*, (iii) macrophages exposed to *C. albicans* that remained uninfected and (iv) *C. albicans*  
75 exposed to macrophages that remained un-engulfed. As mixed populations of cells show phenotypic  
76 heterogeneity over the course of *in vitro* infection experiments, we hypothesized that we would observe  
77 transcriptional variation in genes important for these interactions among single, macrophages infected  
78 with *C. albicans*. Additionally, we hypothesized that transcriptional variability among single host cells  
79 may be correlated with gene expression differences in phagocytosed *C. albicans*. Here, we isolated  
80 single macrophages infected with *C. albicans* and adapted methods to measure gene expression of the  
81 host and pathogen cells in parallel. Sorting infection subpopulations prior to RNA-sequencing resolved  
82 the signal from different infection fates within a population, especially in phagocytosed *C. albicans*. By  
83 comparing heterogeneity in the transcriptional profiles of *C. albicans* and murine macrophages at both  
84 the subpopulation and single infected cell levels, we characterized how gene expression varies in close  
85 coordination between the host and pathogen across distinct infection fates. We found cell-to-cell  
86 variability when we analyzed single infected macrophages, and that key genes involved in host immune  
87 response and in fungal morphology and adaptation show expression bimodality that can be resolved as  
88 tightly coupled time-dependent transcriptional responses between the host and fungal pathogen.

89

## 90 **Results**

91

### 92 **Characterization of heterogeneous infection subpopulations in *ex vivo* macrophage and** 93 ***Candida albicans* interactions**

94

95 To capture heterogeneous infection subpopulations and examine parallel shifts in host and pathogen  
96 interactions, we developed a system for fluorescent sorting of both live and dead *Candida albicans* with  
97 macrophages during phagocytosis (**Methods**). We constructed a *C. albicans* strain that constitutively  
98 expresses Green Fluorescent Protein (GFP) and mCherry; when *C. albicans* cells lyse in the acidic  
99 macrophage phagosome, GFP loses fluorescence upon change in pH<sup>15</sup> whereas mCherry remains  
100 stable for up to 4 hours in this environment as visualized by microscopy (**Figure S1**). We confirmed that  
101 the reporter construct was present at *NEUT5* locus via whole genome sequencing of the SC5314-  
102 *NEUT5L-NAT1-mCherry-GFP* strain (**Methods**). This *C. albicans* reporter strain was co-incubated with

103 macrophages and sorted using fluorescent activated cell sorting (FACS) at time intervals (0,1, 2 and 4  
104 hours) to isolate different host-fungal pathogen subpopulations and single-cell pairs (**Figure 1A**). These  
105 time points were selected to capture the rapid transcriptional changes of *C. albicans* in response to  
106 macrophages<sup>3</sup>. Primary bone derived macrophages were stained with CellMask Deep Red plasma  
107 membrane stain prior to sorting. To examine gene expression profiles, both host and fungal RNA were  
108 extracted and adapted for Illumina sequencing using Smart-Seq2 (**Methods**). Both microscopy and  
109 FACS analysis revealed that four distinct infection subpopulations can be isolated (**Figure S2A**): (i)  
110 macrophages infected with live *C. albicans* (GFP+, mCherry+, Deep red+), (ii) macrophages infected  
111 with dead *C. albicans* (GFP-, mCherry+, Deep red+), (iii) macrophages exposed to *C. albicans* (GFP-,  
112 mCherry-, Deep red+) and (iv) *C. albicans* exposed to macrophages (GFP+, mCherry+, Deep red-;  
113 **Figure 1A**).

114  
115 The number of RNA-Seq reads and transcripts detected for both host and fungal pathogen  
116 subpopulations was sufficient for differential expression analysis in most samples and to widely profile  
117 parallel transcriptional responses. We aligned reads to a composite reference of both mouse and *C.*  
118 *albicans* transcriptomes (**Methods**) and found that the fraction of mapped reads for host and pathogen  
119 was correlated with the percent of sorted cells for each subpopulation (**Figures 1B, S2B; Table S1**). In  
120 subpopulations containing both host and pathogen, the fraction of reads averaged 87% macrophage  
121 and 13% *C. albicans* for macrophages infected with live fungal cells, and 95% macrophage and 5% *C.*  
122 *albicans* for macrophages containing dead fungal cells. For the subpopulation of macrophages infected  
123 with live fungal cells, between 1.4 and 34.0 million reads mapped to host transcriptome, while between  
124 0.3 to 13.3 million reads mapped to *C. albicans* transcriptome. *Candida* reads in this subpopulation  
125 increased over time, reflecting ongoing phagocytic activity during the time course (0,1, 2 and 4 hours;  
126 **Figure 1B**). In subpopulations of dead phagocytosed cells, read counts were lower than other  
127 subpopulations and counts increased over time, reflecting their smaller proportion of sorted cells that  
128 also increased over time (**Figure S2B**). In subpopulations of macrophages infected with live fungus, an  
129 average of 10,333 host and 4,567 *C. albicans* genes were detected (at least 1 fragment per replicate  
130 across all samples; **Methods; Figure S3A; Table S1**). Fewer transcripts were detected in  
131 subpopulations of macrophages infected with dead *C. albicans* (an average of 3,214 host transcripts  
132 and 983 fungal transcripts **Figure S3A**) and had modestly correlated biological replicates (e.g.  
133 Pearson's  $r < 0.56$ ). Lower coverage was expected for this subpopulation, as only up to 3% of each  
134 sample collected at each time point was comprised of macrophages infected with dead *C. albicans*  
135 (**Figure S2B**). Therefore, we primarily focused the differential expression analysis on subpopulations of

136 macrophages or *C. albicans* exposed, and macrophages infected with live *C. albicans*, which had high  
137 transcriptome coverage, and highly correlated biological replicates (e.g. Pearson's  $r$  0.96 and 0.92 in  
138 macrophages and *Candida* at 4 hours, respectively; **Figure S3B**). These results indicate that we have  
139 established a robust system for measuring host and fungal pathogen transcriptional signal during  
140 phagocytosis in sorted infection subpopulations.

141  
142 Next, we examined the major expression profiles in both the host and fungal pathogen. We identified  
143 1,218 and 2,226 differentially expressed genes (DEGs; fold change (FC) > 4; false discovery rate (FDR)  
144 < 0.001) among all pairwise comparisons in *C. albicans* and macrophages, respectively (**Methods**;  
145 **Figure 2**; **Data set 1** and **2**). To determine major patterns of infection-fate specific or interaction-time  
146 specific in *C. albicans* and macrophages, we used DEGs to perform Principal component analysis  
147 (PCA), then PC scores were clustered by *k-means* (**Methods**). PC analysis revealed that the  
148 transcriptional response of both macrophages and *C. albicans* could be more finely characterized using  
149 sorted subpopulations and how this response varied over time. For both host and pathogen, PC1  
150 separates the samples by subpopulation whereas PC2 separates the samples by time (**Figures 2A**,  
151 **2C**). Examining sorted infection subpopulations revealed a close relationship between the infected and  
152 exposed macrophage subpopulations at the same time point where as distinct *C. albicans*  
153 subpopulations appeared more separate as described below. This highlights how cell sorting can  
154 resolve the signal from different infection fates within a population.

155  
156 **Subpopulations of phagocytosed *C. albicans* adapt to macrophages by switching metabolic**  
157 **pathways and regulating cell morphology**

158  
159 We next examined how *C. albicans* gene expression varied across unexposed, exposed and  
160 phagocytosed cells over time. Using *k-means* clustering, we identified sets of genes with similar  
161 expression patterns; the major patterns of expression across time were either induced (cluster 1, 2 and  
162 3) or repressed (cluster 4 and 5) in the live, phagocytosed subpopulation relative to all other *C. albicans*  
163 infection fates (**Figures 2B**, **S4A**). A large number of genes were differentially expressed in  
164 phagocytosed *C. albicans* (732 genes relative to unexposed across all time points) compared with the  
165 number of DEGs found in exposed but un-engulfed *C. albicans* (82 genes relative to unexposed across  
166 all time points). Comparing the phagocytosed and un-engulfed *C. albicans* subpopulations at each time  
167 point, the major differential response was found at 1 hour, highlighting a rapid and specific

168 transcriptional response upon macrophage phagocytosis. Many of these genes maintained high  
169 expression levels throughout the 4-hour infection time course (**Table S2; Figures 2B, 2E**).

170

171 Genes highly induced in phagocytosed *C. albicans* are involved in adaptation to the macrophage  
172 environment. This highlights major changes in metabolic pathways; these genes (cluster 1; **Figure 2B,**  
173 **2E**) are involved in glucose and carbohydrate transport, carboxylic acid and organic acid metabolism,  
174 and fatty acid catabolic processes (enriched GO terms corrected- $P < 0.05$ , hypergeometric distribution  
175 with Bonferroni correction; **Table S3**). Prior microarray analysis of *C. albicans* exposed to macrophages  
176 reported that similar changes in metabolism and nutrient uptake allow *Candida* to utilize the limited  
177 spectrum of nutrients available in the phagosome<sup>3</sup>. With RNA-Seq data and sorted infection fates, we  
178 observed upregulation of additional genes related to these functions and confirmed which expression  
179 changes were specific to the phagocytosed *C. albicans* subpopulation (**Table S2**). Genes involved in  
180 glyoxylate metabolism, the beta-oxidation cycle and transmembrane transport were significantly  
181 induced in phagocytosed *C. albicans* relative to exposed cells. By contrast, multiple classes of  
182 transporters were highly up-regulated in both engulfed and exposed *C. albicans* subpopulations,  
183 including oligopeptide transporters, several high affinity glucose transporters, and amino acid  
184 permeases, suggesting these changes are not in response to phagocytosis (**Figure 2B; Tables S2 and**  
185 **S3**). Cluster 1 includes genes involved in pathogenesis and genes associated with the formation of  
186 hyphae, including core filamentous response genes (*ALS3, ECE1, HTG2, ORF19.2457*; **Table S2**)<sup>17</sup>.  
187 Overall, gene expression levels in cluster 1, including filamentation genes, increased over the time  
188 course with the highest expression at 4 hours, regardless of whether *C. albicans* cells were  
189 phagocytosed or remained un-engulfed, suggesting that these genes were induced by the presence of  
190 macrophages. While media containing serum can also induce *C. albicans* filamentation, we found that  
191 those genes were more highly induced upon phagocytosis (**Table S2; Figure S4B**). We also identified  
192 genes induced in live, phagocytosed *C. albicans* and repressed in un-engulfed cells relative to the  
193 unexposed subpopulation (cluster 2; **Figure 2B**). Cluster 2 includes several secreted aspartyl  
194 proteases and additional genes involved in transmembrane transport (Opt and Hgt classes; **Tables S2**  
195 **and S3**). These transporters differ with those found in cluster 1, as the scale of their induction after  
196 phagocytosis was more modest. Other sets of genes up-regulated during *C. albicans* phagocytosis in  
197 cluster 3 had lower induction relative to cluster 1 or cluster 2. This set included genes related to  
198 oxidation-reduction processes, including dehydrogenases, mitochondrial respiratory response, and  
199 transcription factors (enriched GO terms, corrected- $P < 0.05$ , hypergeometric distribution with

200 Bonferroni correction; **Figure 2B; Table S3**). Cluster 1, 2, and 3 encompassed the major transcriptional  
201 modules up-regulated in *C. albicans* upon phagocytosis.

202

203 Other sets of genes were specifically down-regulated in live, phagocytosed *C. albicans* at the earliest  
204 time point, whereas expression levels of these genes did not change in non-phagocytosed *C. albicans*  
205 (both unexposed and exposed) over the time course (cluster 4 and 5; **Figures 2B, 2E**). In cluster 4,  
206 which displays the strongest signature of repression, genes down-regulated in phagocytosed *C.*  
207 *albicans* recovered their expression levels at 4 hours. This cluster includes genes related to the  
208 translation machinery and peptide biosynthesis, including ribosomal proteins, chaperones and  
209 transcription factors that regulate translation (enriched GO terms, corrected- $P < 0.05$ , hypergeometric  
210 distribution with Bonferroni correction; **Table S3; Figure S4B**). Repression of the translation machinery  
211 was previously noted as a response of *C. albicans* to macrophage interaction<sup>3</sup>. Here, we demonstrated  
212 that down-regulation of ribosomal proteins, chaperones and translation-regulator transcription factors is  
213 specific to phagocytosed *C. albicans* and that expression of these genes recovered at later time points  
214 (**Figures 2E, S4B**). Cluster 4 also encompassed highly repressed yeast-phase specific genes,  
215 including those involved in ergosterol biosynthesis, cell growth and cell wall synthesis (**Figures 2B,**  
216 **S4B; Table S2**). Cluster 5, which was not as strongly repressed as cluster 4, includes a set of genes  
217 down-regulated in phagocytosed *C. albicans* that did not recover expression over the length of the time  
218 course (**Table S2**). These genes are largely involved in nucleoside metabolic processes and host  
219 adaptation (enriched GO terms, corrected- $P < 0.05$ , hypergeometric distribution with Bonferroni  
220 correction; **Figure 2B; Table S3**). A subset of these down-regulated genes were involved in  
221 morphological and cell surface remodeling, including three essential negative regulators of filamentation  
222 (*SSN6*, *MFG1*, and *TUP1*)<sup>18–21</sup>. This subset also includes additional repressors of filamentation<sup>22</sup> and  
223 transcription factors that regulate the white-opaque phenotypic switch (*WOR1* and *WOR2*)<sup>23,24</sup> and  
224 commensalism in the mammalian gut (*WOR1*)<sup>25</sup> (**Figures 2B, S4**). These results highlight that a large  
225 part of the observed transcriptional variation is likely due to the down-regulation of these transcriptional  
226 regulators.

227

228 Together, the expression patterns in the phagocytosed *C. albicans* subpopulation suggest a rapid shift  
229 in gluconeogenic metabolism, amino acids uptake, reorganization of the cell wall and initiation of a  
230 hyphal program. In particular, the transcriptional repression program triggered by phagocytosis  
231 provides new insight into the time-specific adaptation of *C. albicans* phagocytosed by macrophages.  
232 These gene expression patterns reflect changes in *C. albicans* metabolism and growth from within

233 macrophages. While some of these results recapitulated those from non-sorted, bulk transcriptional  
234 studies of *C. albicans* and phagocytic cells<sup>3,10,26,27</sup>, analysis of sorted subpopulations differentiated gene  
235 expression changes that are specific to *C. albicans* phagocytosis from those that may reflect only  
236 exposure to immune cells.

237

### 238 **Subpopulations of macrophages showed major pathogen recognition and pro-inflammatory** 239 **response to *C. albicans* and shift profiles at late time course**

240

241 In parallel with the analysis of *C. albicans* gene expression, we also examined the transcriptional  
242 response of macrophages. Across all samples, we identified 2,226 DEGs (FC > 4; FDR < 0.001; **Data**  
243 **set 2**), which grouped into four clusters with similar expression patterns. PC analysis showed that  
244 exposed and infected macrophages clustered closely together, separately from unexposed  
245 macrophages along the PC1 and PC2, indicating that exposed and infected macrophages had similar  
246 transcriptional responses, which primarily varied across time in the first and second PCs (cluster 1 and  
247 2; **Figure 2C**). This suggests that the early (1 to 4 hours) host transcriptional response to *C. albicans* is  
248 set during exposure and maintained during phagocytosis. For both exposed and infected macrophages,  
249 a major difference was found between 2 and 4 hours along PC2, which highlights genes that were  
250 differentially induced or repressed at 4 hours in these subpopulations (clusters 3 and 4; **Figure 2C,D**).

251

252 In all four clusters, infected and exposed macrophages have similar patterns of differential expression  
253 relative to unexposed macrophages (**Figure 2D**). Overall, these clusters were significantly enriched in  
254 activation, migration, phagocytosis, and triggering the innate immune response; this includes the  
255 induction of pathways such as IL-6, IL-8 and NF- $\kappa$ B signaling, Fc $\gamma$  Receptor-mediated phagocytosis,  
256 production of nitric oxide and reactive oxygen species (ROS), Pattern Recognition Receptors (PRR),  
257 RhoA, ILK, and Leukocyte Extravasation signaling ( $P$ -value < 0.05 right-tailed Fisher's Exact Test;  
258 **Figures 2D, S5**). Activation of some of these pathways is consistent with previous analysis of  
259 phagocyte transcriptional responses to *C. albicans* infection (**Figure S6**)<sup>8-10,28</sup> however, sorting distinct  
260 infection subpopulations during early time points of infection established that host cells up or down  
261 regulate subsets of genes upon *C. albicans* exposure and these expression patterns are largely  
262 maintained after *C. albicans* phagocytosis (**Figures 2D, S5**).

263

264 In exposed and infected macrophages, many of the genes induced at 1 hour remained relatively stable  
265 at 2 and 4 hours (cluster 1; **Figure 2D**). These genes are related to defense mechanisms such as pro-



266 inflammatory cytokine production and fungal recognition via transmembrane receptors. Up-regulated  
267 genes related to pro-inflammatory cytokines included tumor necrosis factor (*Tnf*), interleukin 1 receptor  
268 antagonist (*Il1rn*), and chemokines (*Ccl3*, *Cxcl14*, *Cxcl2*; **Figures 2D, S7; Table S4**). Other genes in  
269 cluster 1 include the transmembrane receptors intercellular adhesion molecule 1 (*Icam1*), interleukin 11  
270 receptor subunit alpha (*Il11ra1*), macrophage scavenger receptor 1 (*Msr1*), oxidized low density  
271 lipoprotein receptor 1 (*Olr1*), toll like receptor 2 (*Tlr2*), and the interferon regulatory factor 1 (*Ifr1*;  
272 **Figures 2D, 2F, S7; Table S4**). The chemokine *Cxcl2* and the intracellular receptor *Icam1* have also  
273 been previously shown to be induced during *C. albicans* interactions with other host cells, including  
274 neutrophils *in vitro*<sup>10</sup>, murine kidney<sup>8</sup>, a murine vaginal model<sup>28</sup>, and mouse models of hematogenously  
275 disseminated candidiasis and of vulvovaginal candidiasis in humans<sup>29</sup>, highlighting the role of these  
276 genes in host defense against *C. albicans* infection of different tissues (**Figure S6**).

277

278 A second set of genes was up-regulated in both exposed and infected macrophages, with peak  
279 expression at 2 hours in exposed macrophages (cluster 2; **Figure 2D; Table S4**). This set of genes is  
280 associated with pathogen recognition, opsonization, and activation of the engulfment (*P*-value < 0.05  
281 right-tailed Fisher's Exact Test; **Table S5**), including *Clec7a* (also known as *Dectin-1*), lectin-like  
282 receptors such as galectin 1 (*Lgals1*) and galectin 3 (*Lgals3*; **Figure 2D; Tables S4 and S5**), and other  
283 transmembrane receptors (*Cd36*, *Cd74*, *Fcer1g*, *Ifnar2*, *Igsf6*, *Itgb2*, *Gm14548*, *Trem2*; **Table S4 and**  
284 **S5**). In addition, several complement proteins were found more highly induced in exposed  
285 macrophages, including complement factor properdin (*Cfp*), extracellular complement proteins (*C1qa*,  
286 *C1qb*, and *C1qc*), and complement receptor proteins (*C3ar1* and *C5ar1*). These results highlight the  
287 importance of *C. albicans* recognition and activation of engulfment in the exposed macrophage  
288 subpopulation. Since these genes maintained high expression in infected macrophages, they may also  
289 play an important role during phagocytosis or allow for uptake of additional *C. albicans* cells.

290

291 We also examined subpopulations of macrophages infected with dead *C. albicans*; this data was  
292 analyzed separately, as the total number of cells sorted and therefore the transcriptome coverage was  
293 low (*i.e.* 31% relative to macrophages infected with live *C. albicans*; see above). While we did not have  
294 sufficient data to examine *C. albicans* transcripts (*i.e.* 21% transcriptome coverage relative to exposed  
295 and live-phagocytosed subpopulations; see above), our analysis of the host transcripts revealed a small  
296 set of highly induced genes. This set includes pro-inflammatory cytokines such as *Ccl3*, *Cxcl2*, *Cxcl14*,  
297 *Il1rn*, and *Tnf*, and transcription regulators such as *Cebpb*, *Irf8*, and *Nfkb1a* (**Figure S8**). These genes  
298 were also induced in macrophages infected with live *C. albicans* (clusters 1 and 2; **Figure 2D**),

299 indicating that maintaining expression of these genes may be important for pathogen clearance after  
300 phagocytosis.

301  
302 Another major shift in gene expression occurred at 4 hours, with sets of genes highly repressed or  
303 highly induced at this later time point (cluster 3 and 4, respectively; **Figures 2D, 2F**) in both the  
304 exposed and infected macrophage subpopulations. Highly repressed genes at 4 hours (cluster 3) are  
305 enriched in cytokines (*Il1a*, *Irf4*) and transmembrane receptors, including intracellular toll-like receptors  
306 (*Tlr5* and *Tlr9*), and interleukin receptors (*Il1r1*, *Irf4*, *Il17ra*). This cluster was also enriched in categories  
307 associated with proliferation and immune cell differentiation ( $P$ -value < 0.05 right-tailed Fisher's Exact  
308 Test; **Table S5**). By contrast, macrophage genes highly induced at 4 hours (cluster 4) were enriched in  
309 categories related with phagocytosis and programmed cell death mechanisms, including the chemokine  
310 *Cxcl10*, and transcriptional regulators that play a role in inflammation and programmed cell death  
311 (*Cebpd*, *Fos*, *Irf2bp1*, *Irf8*, *Irf9*, *Nfkbie*, *Card9*, *Bcl2*; ( $P$ -value < 0.05 right-tailed Fisher's Exact Test;  
312 **Table S5**). This suggests that during phagocytosis of *C. albicans* there was a strong shift toward a  
313 weaker pro-inflammatory transcriptional response by 4 hours. Our approach not only identified genes  
314 specifically induced in infected macrophages, but also highlighted expression transitions related to time  
315 of *C. albicans* exposure. These patterns were conserved among subpopulations of exposed and  
316 infected macrophages and corresponded with shifts in pathogen gene expression (**Figures 2A, 2B**; see  
317 below).

318  
319 **Detection of host-pathogen transcriptional responses from single macrophages infected with**  
320 ***C. albicans***

321  
322 Even in sorted populations, individual cells may not have uniform expression patterns, as they can  
323 follow different trajectories over time. To address this, we next examined the level of single cell  
324 transcription variability during infection. We collected sorted, single macrophages infected with live or  
325 dead *C. albicans*, at 2 and 4 hours, and adapted the RNA of both the host and pathogen for Illumina  
326 sequencing using Smart-seq2 (**Figure 1A; Methods**). With this approach, each infected macrophage  
327 and the corresponding phagocytosed *C. albicans* received the same sample barcode, allowing us to  
328 pair transcriptional information for host and pathogen at the single, infected cell level. While we can  
329 successfully isolate single infected macrophages via FACS, we cannot control for the number of *C.*  
330 *albicans* cells inside of each macrophage with this approach, since macrophages phagocytose variable  
331 numbers of *C. albicans* cells<sup>12</sup> (**Methods**). We obtained 4.03 million paired-end reads per infected cell

332 on average; a total of 449 single, infected macrophages had more than 1 million paired-end reads, over  
333 99% of which passed our sequence quality-control filters (**Figure S9A; Table S1**). For macrophages  
334 with live *C. albicans*, we found an average 75% of reads mapped to host transcripts and 11% of reads  
335 mapped to *C. albicans* transcripts (**Figure 3A**). Although parallel sequencing of host and pathogen  
336 decreases the sensitivity to detect both transcriptomes, the number of transcripts recovered ( $> 1$   
337 Transcripts Per Million, TPM) for macrophages and *C. albicans* was sufficient for cell clustering and  
338 differential expression (see below). Of the 224 single macrophages infected with live *C. albicans* with  
339 more than 0.5 million reads, 202 (90.2%) had at least 2,000 host-transcripts detected (3,904 on  
340 average), and 162 (72.3%) had at least 600 *C. albicans* transcripts detected (1,435 on average;  
341 **Figures 3A, S9A**). The fact that we detected fewer fungal transcripts relative to the host was expected,  
342 as the fungal transcriptome is approximately four times smaller than the host transcriptome. Relative to  
343 the number of transcripts detected in subpopulations of macrophages infected with live *C. albicans*, this  
344 represents a single-infected-cell transcriptome coverage sensitivity of 38% and 31% for host and *C.*  
345 *albicans* transcripts respectively, indicating that we obtained sufficient sequencing coverage for both  
346 species. Additionally, we found that pooling single infected cell expression measurements could  
347 recapitulate the corresponding subpopulation expression levels. We found that the extensive cell-to-cell  
348 variation between single infected macrophages (average Pearson's from  $r$  0.18 to 0.88; **Figure 3B**) was  
349 reduced when we aggregated the expression of 32 single-cells (**Figure S10**). These results are  
350 consistent with previous single cell studies of immune cells<sup>13,14,30</sup>, and indicate that we can accurately  
351 detect gene expression in single infected macrophages and phagocytosed *C. albicans*.

352

### 353 **Dynamic host-pathogen co-states defined by analysis of single macrophages infected with live** 354 ***C. albicans***

355

356 To finely map the basis of heterogeneous responses during infection, we clustered cells by differential  
357 expressed genes in single macrophages infected with live, phagocytosed *C. albicans*. Since we  
358 measured both host and pathogen gene expression changes in single infected cells, we identified host-  
359 pathogen co-states in groups of single infected macrophages and phagocytosed *C. albicans* pairs that  
360 showed similar gene expression profiles. Briefly, we used genes exhibiting high variability across the  
361 infected macrophages and live, phagocytosed *C. albicans* at 2 and 4 hours. We then reduced the  
362 dimensionality of the expression with principal components analysis (PCA), and clustered cells with the  
363 t-distributed stochastic neighbor embedding approach (t-SNE)<sup>31</sup> as implemented in Seurat<sup>32</sup> (**Methods**).  
364 We identified differentially expressed genes (corrected- $P < 0.05$ ) using a likelihood-ratio test (LRT) for

365 single-cell differential expression<sup>33</sup> (**Methods**). The transcriptional response among single infected  
366 macrophages exhibited two time-dependent states (state 1<sup>M</sup> and state 2<sup>M</sup>) associated with expression  
367 shifts from 2 to 4 hours (**Figure 4, top**; **Figure S11A**). While cells were largely separated into these two  
368 states by time, a few macrophages were assigned to the alternate cell state by unsupervised clustering  
369 and appeared to be either early or delayed in the initiation of the transcriptional shift in the immune  
370 response. Immune cells that display asynchrony in their transcriptional response have previously been  
371 reported in LPS-stimulated dendritic cells, where a few “precocious” cells expressed high levels of  
372 immune response genes early, leading to cytokine secretion and activation of other cells in the  
373 population<sup>30</sup>. However, precocious host cell expression can also be related to pathogen state<sup>14</sup>. In  
374 single infected macrophages, we found that 88 and 70 differentially expressed genes (likelihood-ratio  
375 test (LRT),  $P < 0.001$ ) that showed higher expression in the single, infected macrophages assigned to  
376 state 1<sup>M</sup>, and assigned to state 2<sup>M</sup>, respectively (**Table S6**). Genes in state 1<sup>M</sup> are related with pro-  
377 inflammatory response, and their expression significantly decreases in state 2<sup>M</sup>; at 4 hours (**Figure 4,**  
378 **top**). This set comprises pro-inflammatory repertoire, such as cytokines (*Tnf*, *Ilf3*, *Ccl7*),  
379 transmembrane markers (*Cd83*, *Cd274*), interleukin receptors (*Il21r*, *Il4ra*, *Il6ra*, *Il17ra*) and the high  
380 affinity receptor for the Fc region (*Fcgr1*); and the transcriptional regulators *Cebpb* and *Cebpa* (**Figure**  
381 **4, top**). Many genes variably expressed in these single, infected macrophages were also found to be  
382 up-regulated in subpopulations of infected and exposed macrophages (*e.g.* *Tnf*, *Orl1*, **Figures S7,**  
383 **S12**); however, significant differences in expression of these genes between the 2 and 4 hours  
384 subpopulations samples were not detected, as subpopulation RNA-Seq average the gene expression of  
385 thousands of cells. These results highlight that cell-to-cell variability within each time point can only be  
386 observed when we analyzed single infected macrophages.

387

388 As each single, infected macrophage received a unique sample barcode and host and fungal  
389 transcription were measured simultaneously, we matched expression from each macrophage with that  
390 of the live, phagocytosed fungus (**Figure 4, bottom**). Notably, independent analysis of the parallel  
391 fungal transcriptional response identified two pathogen stages that were also primarily distinguished by  
392 time. In live phagocytosed *C. albicans*, we found a total of 168 differentially expressed genes  
393 (likelihood-ratio test (LRT),  $P < 0.001$ ), 80 and 86 genes showed higher expression in *C. albicans*  
394 phagocytosed by macrophages assigned to state 1<sup>M</sup>, and state 2<sup>M</sup>, respectively (**Table S7**). In *C.*  
395 *albicans*, genes in state 1<sup>C</sup> were enriched in organic acid metabolism ( $P = 6.63e-11$ ; enriched GO term,  
396 corrected- $P < 0.05$ , hypergeometric distribution with Bonferroni correction; **Table S8**), including a strong  
397 upregulation of transporters (*HGT13*) and glyoxylate cycle genes, specifically those from beta-oxidation

398 metabolism (*ECI1*, *FOX3*, *FOX2*, *PXP2*; **Figure 4, bottom**). Most macrophages infected by *C. albicans*  
399 in state 1<sup>M</sup> induced a strong pro-inflammatory response (co-state 1; **Figure 4**). At 4 hours, expression  
400 of these genes was reduced and we observed an up-regulation of genes enriched in carbon  
401 metabolism ( $P = 2.43e-05$ ; enriched GO term, corrected- $P < 0.05$ , hypergeometric distribution with  
402 Bonferroni correction; **Table S8**), including genes related with a shift to glycolysis and gluconeogenesis  
403 (*PGK1*), fatty acid biosynthesis (*FAS1*, *ACC1*), and genes associated with filamentation, such as *ECE1*,  
404 *HWP1*, *OLE1*, *RBT1*; whereas the majority of infected macrophages had down-regulated expression of  
405 pro-inflammatory cytokines (co-state 2; **Figure 4**). In summary, these 2 host-pathogen co-states largely  
406 correspond to time of infection and highlight an asynchronous shift from a strong to a weak pro-  
407 inflammatory gene expression profile in the host that in turn correlated with the induction of genes  
408 related to filamentation and metabolic adaptation to host in the fungal pathogen.

409

#### 410 **Expression bimodality in host and fungal pathogen measured in single macrophages infected** 411 **with live *Candida albicans***

412

413 We next examined expression patterns in infected macrophages, which may lead to or result from  
414 distinct expression programs in phagocytosed *C. albicans*. Previous work demonstrated that single  
415 dendritic cells stimulated with LPS displayed expression bimodality in a subset of immune response  
416 genes<sup>13,30</sup>. To further examine heterogeneity in gene expression, we first characterized unimodal and  
417 bimodal expression profiles, and then compared these distributions in host-pathogen single cells across  
418 and within 2 and 4 hours, using a normal mixture model and Bayesian modeling framework as  
419 implemented in scDD<sup>34</sup> (**Methods**). Overall, an average of 84.5% of the genes that met the filtering  
420 criteria in infected macrophages (**Methods**) displayed unimodal distributions (**Figure S11; Table S9**).  
421 Highly expressed (top 5%) unimodal genes with similar expression profiles at 2 and 4 hours  
422 encompassed genes involved in the immune response to *C. albicans* infection, including genes  
423 enriched in pathogen recognition, opsonization, and activation of engulfment (cluster 2; **Figure 2D**),  
424 such as complement proteins (*C1qb*, *C1qc*) and galectin receptors that recognize beta-mannans  
425 (*Lgals1*, *Lgals3*; **Figure S11**). In phagocytosed *C. albicans*, most genes (an average of 76% of the  
426 genes detected; **Methods**) also had unimodal expression patterns (**Figure S11; Table S10**). We also  
427 found a set of unimodal genes with similar expression profiles at both time points, which were enriched  
428 in the oxidation-reduction process and defense against reactive oxygen species (enriched GO term,  
429 corrected- $P < 0.05$ , hypergeometric distribution with Bonferroni correction; **Table S10**). These results

430 demonstrated uniformly gene expression patterns among all single host and phagocytosed fungal cells  
431 for core genes involved in host immune response to fungus and pathogen virulence, respectively.

432

433 A subset of the genes highly expressed in co-states of single infected macrophages and phagocytosed  
434 *C. albicans* showed evidence of transcriptional heterogeneity, forming bimodal expression distributions.  
435 As expression bimodality in single infected cells can signify distinct immune cell levels<sup>13,30</sup>, we  
436 examined whether subgroups of single macrophages infected by *C. albicans* could be defined by  
437 shared bimodality of genes involved in the immune response. We characterized genes that showed  
438 patterns of bimodal distribution among or within 2 and 4 hours in infected macrophages (an average of  
439 15% of the genes; exceeded Bimodality Index (BI) threshold; Dirichlet Process Mixture of normals  
440 model; **Table S9, Figure S11**). We found that genes involved in pathogen intracellular recognition and  
441 pro-inflammatory response (*e.g. Olr1, Il4ra, Il21r, Il1rn, and Tnf*) exhibited expression heterogeneity and  
442 bimodality within and among single infected macrophages at 2 and 4 hours (**Figure S13, top; Table**  
443 **S9**). In addition, we further identified differential distributions (*e.g.* shifts in mean(s) expression,  
444 modality, and proportions of cells) across and within 2 and 4 hours as implemented in scDD package<sup>34</sup>.  
445 We found a subset of immune genes that showed differential distribution ( $P < 0.05$ , Benjamini-  
446 Hochberg adjusted Fisher's combined test). For example, the *Olr1* lectin-like receptor, the tumor  
447 necrosis factor receptor superfamily member 12a (*Tnfrsf12a*), and the transmembrane marker *Cd83*,  
448 had bimodal expression distribution at 2 hours but not at 4 hours; the interleukin 4 receptor, alpha  
449 (*Il4ra*) and the transmembrane marker *Cd300a* had bimodal distribution at 4 hours but not at 2 hours;  
450 and the interleukin 21 receptor (*Il21r*) had differential distribution and is bimodal at both 2 and 4 hours  
451 (**Table S9**). Prior work demonstrated that macrophages infected with *Salmonella* and stimulated with  
452 LPS also exhibited heterogeneity and bimodal expression patterns in subsets of genes, including some  
453 immune response genes<sup>14</sup>. Similar to macrophages infected with *Salmonella* and stimulated with LPS,  
454 *Tnf* and *Il4ra* exhibited bimodal expression patterns in single macrophages infected with *C. albicans*<sup>14</sup>  
455 (**Figure S13, top**). Additionally, we found unique subsets of genes displaying differential distributions in  
456 single macrophages infected with *C. albicans*, but not in response to *Salmonella* or LPS, including  
457 *Il17ra* and other lectin-like receptors (**Figure S14**). These results highlight heterogeneity in gene  
458 expression patterns among single macrophages infected with live *C. albicans* that might indicate  
459 distinct cell levels and trajectories in response to fungal infection and suggest that some expression  
460 heterogeneity in macrophages is pathogen specific, likely a result of variably expressed pathogen-  
461 specific receptors.

462

463 We next hypothesized that *C. albicans* may also demonstrate expression heterogeneity and bimodality  
464 that is correlated with expression in the corresponding macrophage cell. We found an average of 23%  
465 *C. albicans* genes that showed patterns of bimodality at 2 and 4 hours (**Table S10; Figure S11**). We  
466 also further examined if genes in phagocytosed *C. albicans* exhibited differential distributions (e.g.  
467 shifts in mean(s) expression, modality, and proportions of cells) across and within 2 and 4 hours using  
468 scDD<sup>34</sup>. We found a subset of virulence-associated genes that showed differential distribution ( $P < 0.05$ ,  
469 Benjamini-Hochberg adjusted Fisher's combined test). Genes showing bimodal expression only at 2  
470 hours were enriched in regulation of defense response (enriched GO term, corrected- $P < 0.05$ ,  
471 hypergeometric distribution with Bonferroni correction; **Table S10**), including genes associated with *C.*  
472 *albicans* response to phagocytosis (*CAT1*, *IMH3*, *ADH1*, *SSB1*, *PCK1*). Meanwhile, genes with a  
473 bimodal distribution detected only at 4 hours were enriched in pentose/xylose transport (*HGT10*,  
474 *HGT12*). Other subsets of genes that showed differential distributions were enriched in cell adhesion  
475 and filamentation, oxidation-reduction process and fatty acid oxidation (enriched GO term, corrected- $P$   
476  $< 0.05$ , hypergeometric distribution with Bonferroni correction; **Table S10**), including genes involved in  
477 the core filamentation network (*ALS3*, *ECE1*, *HGT2*, *HWP1*, *IHD1*, *OLE1*), beta-oxidation and  
478 glyoxylate cycle (*ANT1*, *MDH1-3*, *FOX2*, *POX1-3*, *PEX5*, *POT1*), and response to oxidative stress  
479 (*DUR1,2*, *GLN1*, *PGK1*; **Table S10; Figure S13, bottom**). These results suggest that expression  
480 heterogeneity and bimodality of key genes involved in host immune response and fungal morphology  
481 and adaptation are tightly coupled during host- fungal pathogen responses and might result in different  
482 levels of immune response and virulence.

483

#### 484 **Dual RNA-Seq of subpopulations and single infected cells revealed tightly coupled macrophage** 485 **and *Candida albicans* transcriptional responses**

486

487 By parallel sequencing of host and pathogen transcriptomes in sorted infection subpopulations and in  
488 single infected macrophages, we can directly contrast gene expression changes in the host and fungal  
489 pathogen to characterize these interactions. While sorted subpopulations allow for detection of patterns  
490 across a group of cells, comparing the host and pathogen transcripts from single infected macrophages  
491 allows more precise detection of how host and pathogen gene expression co-vary, and the  
492 consequences of transcriptional heterogeneity in the infection outcome. Gene expression changes in  
493 subpopulations of exposed and infected macrophages highlighted immune gene functions that were  
494 induced early during these interactions and stable during the time course of infection (between 1 and 4  
495 hours); this included genes important for pathogen recognition (e.g. *Tlr2*, *Clec7a*, *Lgal3*) and pro-

496 inflammatory cytokine production and phagocytosis (*e.g. Tnf, Cxcl10, Irf1*). Other sets of genes shifted  
497 in gene expression in subpopulations of macrophages exposed to or infected with live *C. albicans* from  
498 2 to 4 hours, including up-regulation of genes required for the activation of the inflammasome (*e.g.*  
499 *Nod2, Card9*), and the down-regulation of pro-inflammatory cytokines (*e.g. Il1a, Il1r1, Il17ra*) and  
500 intracellular receptors (*e.g. Tlr5, Tlr9*; **Figures 2C, 2D**). Live phagocytosed *C. albicans* within these  
501 macrophages showed a rapid shift in gluconeogenic metabolism, amino acid uptake, cell wall  
502 remodeling, and initiation of filamentation (**Figure 2A, B**). Up-regulation of gene clusters increased over  
503 the time course with the highest expression at 4 hours, and down-regulation of gene clusters recovered  
504 their expression levels at 4 hours, when macrophages up-regulated inflammasome-associated genes  
505 and down-regulated of pro-inflammatory cytokines and intracellular receptors (**Figure 2**).  
506 Transcriptional variability in these subpopulations could be further resolved into distinct transcriptional  
507 states and cell trajectories at the single-cell level that govern infection fate decisions. We observed that  
508 the gene expression in single macrophages infected with live *C. albicans* at 2 and 4 hours was tightly  
509 coupled with that in phagocytosed *C. albicans* and could be described as two, time dependent host-  
510 pathogen co-states. At 2 hours, most single infected macrophages induced genes related to a pro-  
511 inflammatory response and the phagocytosed *C. albicans* upregulated transporters and glyoxylate cycle  
512 genes, specifically those involved in beta-oxidation metabolism (co-state 1; **Figure 4**). However, a  
513 subset of the cells at two hours was more similar to the major co-state found at 4 hours, where  
514 expression of these transporters and metabolic *C. albicans* genes were reduced and we observed an  
515 up-regulation of genes related with filamentation, such as *ECE1, ALS3, OLE1, RBT1*; in parallel,  
516 macrophages down-regulated pro-inflammatory genes (co-state 2; **Figure 4**). Notably, we observed  
517 expression heterogeneity of some infection-induced genes that was only detected at the level of single  
518 host-pathogen cells, which could have affect the outcome of the immune response to *C. albicans*, and  
519 virulence levels in response to phagocytosis. Measuring dual species gene expression in sorted  
520 infection subpopulations and at the single infected cell levels reveals the genes involved in and tightly  
521 coupled patterns of heterogeneity and transcriptional co-states among the host and fungal pathogen.  
522 This approach can further enhance our understanding of distinct infection fate decision and the  
523 correlated gene regulation that governs host cells and fungal pathogens.

524

## 525 Discussion

526

527 Host and fungal cell interactions are heterogeneous, even among clonal cell populations. Resolving this  
528 heterogeneity requires subdividing these populations by infection fate or stage, to measure gene



529 expression changes in specific stages of these interactions. Additionally, measuring host and fungal  
530 pathogen gene expression levels using dual RNA-sequencing can provide insight as to how both  
531 species respond to each other in specific infection states. Here, we developed a generalizable strategy  
532 to isolate distinct host and fungal pathogen infection fates over time and comprehensively measured  
533 subpopulation and single infected cell gene expression changes in both host and pathogen. Our  
534 approach of using sorted cell populations facilitates more precise definition of genes important for host  
535 cell survival, pathogen clearance and fungal virulence.

536  
537 This approach builds on prior RNA-Seq studies of interactions between microbial pathogens and  
538 immune cells. For fungi, previous RNA-Seq studies have largely measured gene expression profiles of  
539 either the host or the fungal pathogen<sup>3,6,7</sup>, and have measured transcription profiles across infection  
540 outcomes<sup>8-11</sup>. Recent similar approaches have measured gene expression in populations of single  
541 phagocytes infected by bacterial pathogens using a similar GFP reporter and FACS isolation in  
542 combination with single-cell RNA-Seq<sup>14-16</sup>. However, these studies mainly focused on the  
543 transcriptional response of the host, as bacterial transcriptomes can be difficult to measure due to their  
544 relatively low number of transcripts<sup>14,16</sup>. By contrast, our method is capable of recovering sufficient host  
545 and *C. albicans* RNA for differential expression measurement; further studies will be needed to examine  
546 if the same or modified approaches can be applied to other microbial pathogens.

547  
548 Our approach demonstrated that distinct infection fates within heterogeneous host and fungal pathogen  
549 interactions can be disambiguated at both the subpopulation and single infected cell level. By  
550 examining single infected macrophages, we showed that host and pathogen transcriptional co-states  
551 are tightly coupled during an infection time course, providing a high-resolution view of host-fungal  
552 interactions. This also revealed that expression heterogeneity in key genes in both infected  
553 macrophages and in phagocytosed *C. albicans* may contribute to infection outcomes. We identified two,  
554 time dependent co-states of host-fungal pathogen interaction. The initial state is characterized by  
555 induction of a pro-inflammatory host profile after 2 hours of interaction with *C. albicans* that then  
556 decreased by 4 hours. A previous study indicated that a balance between pro-inflammatory and anti-  
557 inflammatory responses is necessary for *C. albicans* to establish infection<sup>35</sup>. A decrease in the pro-  
558 inflammatory response after *C. albicans* exposure was also found in human macrophages, where pro-  
559 inflammatory macrophages that interact with *C. albicans* for 8 hours or longer skew toward an anti-  
560 inflammatory proteomic profile<sup>36</sup>. In addition, recent single-cell RNA-Seq analysis of macrophages  
561 containing growing *Salmonella* showed that macrophages shifted to an anti-inflammatory state by 20

562 hours; here, the authors hypothesized that fast-growing intracellular *Salmonella* overcame host  
563 defenses by reprogramming macrophage gene expression<sup>15</sup>. We found that single macrophages  
564 infected with *C. albicans* assigned to co-state 2 decreased expression of pro-inflammatory cytokine  
565 genes and upregulated genes involved in the activation of inflammasomes; this response was coupled  
566 with activation of filamentation and cell-wall remodeling in phagocytosed *C. albicans*. Previous work has  
567 shown that *C. albicans* can escape from macrophage phagosomes by lytic or non-lytic mechanisms.  
568 For example, *C. albicans* can escape by rupturing the macrophage membrane during intra-phagocytic  
569 hyphal growth<sup>37</sup>, or by the activation of one of the macrophage programmed cell death pathways,  
570 including formation of inflammasomes and pyroptosis<sup>38</sup>. Our work suggests that induction of  
571 filamentation and cell-wall remodeling programs in *C. albicans* are coupled to a down-regulation of the  
572 pro-inflammatory state of the host cells.

573

574 Remarkably, both single infected macrophages and the corresponding phagocytosed *C. albicans* cells  
575 exhibit expression bimodality for a subset of genes. The expression bimodality observed for the host as  
576 well as the pathogen is consistent with the evolutionary concept of bet hedging<sup>39</sup>. Both cell types may  
577 rely on stochastic diversification of phenotypes to minimize their risks and improve their survival rate in  
578 the event of an encounter with the other cell type. For instance, clonal populations of *C. albicans* that  
579 find themselves in the unpredictable, changing environment of a host phagocyte could increase the  
580 chance of survival by exhibiting various phenotypes. Fungal cells with maladapted phenotypes are  
581 eliminated so as to increase fitness of a particular genotype that is fit for that environment. A similar  
582 scenario may provide an advantage for phagocytes that have to hedge their bets when they encounter  
583 pleomorphic *C. albicans*. These strategies have been described within microbial populations, where a  
584 small fraction of “persister” cells might be transiently capable of surviving exposure to lethal doses of  
585 antimicrobial drugs as a bet-hedging strategy<sup>40</sup>. While gene expression patterns are correlated in host  
586 and fungal pathogen, it is unclear whether expression heterogeneity among individual infected  
587 macrophages results from or results in expression bimodality among phagocytosed *C. albicans*.

588

589 Our approach represents a novel method to query host-fungal pathogen interaction. The  
590 characterization of genes involved in heterogeneous responses is important to consider in the selection  
591 of novel antifungal drug targets, as designing therapeutics to target products of genes expressed  
592 uniformly among fungal cells in a population may be more effective than targeting the products of  
593 genes expressed by only a subset of cells. Additionally, designing combination immunotherapies to  
594 affect genes discriminative of distinct infection subpopulations, such as those genes upregulated in

595 macrophages infected with dead *C. albicans*, could help to increase the proportion of host cells that  
596 clear the fungal pathogen. Parallel host-fungal pathogen expression profiling could also allow  
597 researchers to not only measure the effects of new drug treatments on the pathogen, but also collect  
598 information on how these treatments affect host cells. As single-cell RNA-Seq microfluidic platforms  
599 continue to develop and become more cost effective to profile thousands of single cells, it will become  
600 tractable to interrogate larger cohorts of host cells infected with fungus. This approach will allow  
601 investigation of fungal phenotypic heterogeneity as a driver of different host responses and provide a  
602 systems view of these interactions.

603

## 604 **Methods**

605

### 606 ***Candida albicans* reporter strain construction**

607 The reporter construct used in this study was prepared by integrating the GFP and mCherry fluorescent  
608 tags driven by the bi-directional *ADH1* promoter and a nourseothricin resistance ( $\text{NAT}^{\text{R}}$ ) cassette at the  
609 Neut5L locus of *Candida albicans* strain SC5314 (**Figure S15**). Briefly, the pUC57 vector containing  
610 mCherry driven by *ADH1* promoter (Bio Basic) was digested and this portion of the plasmid was ligated  
611 into a pDUP3 vector<sup>41</sup> containing GFP, also driven by *ADH1* promoter, a  $\text{NAT}^{\text{R}}$  marker, and homology  
612 to the Neut5L locus. The resulting plasmid was linearized and introduced via homologous  
613 recombination into a neutral genomic locus, Neut5L using chemical transformation protocol with lithium  
614 acetate. Transformation was confirmed via colony PCR and whole-genome sequencing. A whole  
615 genome library was created from strain SC5314-Neut5L-*NAT1*-mCherry-GFP using Nextera-XT  
616 (Illumina) and sequenced on Illumina's Miseq (150x150 paired end sequencing). Sequencing reads  
617 were *de novo* assembled using dipSPAdes<sup>42</sup>. Scaffolds were aligned back to the plasmid used to  
618 transform wild type SC5314 using BLAST<sup>43</sup>. Sequencing coverage was visualized using IGV<sup>44</sup>.

619

### 620 **Macrophage *Candida albicans* infection assay**

621 Primary, bone derived macrophages (BMDMs) were derived from bone marrow cells collected from the  
622 femur and tibia of C57BL/6, female mice. All mouse work was performed in accordance with the  
623 Institutional Animal Care and Use Committees (IACUC) and with relevant guidelines at the Broad  
624 Institute and Massachusetts Institute of Technology, with protocol 0615-058-1. Primary bone marrow  
625 cells were grown in "C10" media as previously described<sup>45</sup> and supplemented with macrophage colony  
626 stimulating factor (M-CSF) (ThermoFisher Scientific) at final concentration of 10 ng/ml, to promote  
627 differentiation into macrophages. Cultures were then stained with F4/80 (Biolegend) to ensure that

628 ~95% of the culture had differentiated into macrophages. To visualize the interactions between BMDMs  
629 and our reporter strain of *C. albicans*, we captured images over time using microwells (**Figure S1**).  
630 BMDMs were incubated in 35 micron by 70 micron by 10 micron microwells (SU-8 spin-coated) for 4  
631 hours, until adherent and elongated. GFP expressing *C. albicans* (SC5314) was added to the  
632 microwells at a multiplicity of infection of 1:1. Microwells were imaged every 3 minutes on an Olympus  
633 IX-83 microscope, with on-stage incubation at 37 °C in RPMI supplemented with FCS for 6 hours. For  
634 the infection experiment, BMDMs were seeded in 6 well plates (Falcon). Two days prior to the start of  
635 the infection experiment, yeast strains were revived on rich media plates. One day prior to the infection  
636 experiment, yeast were grown in 3 ml overnight cultures in rich media at 30 °C. On the day of the  
637 infection experiment, macrophages were stained with CellMask Deep Red plasma membrane stain  
638 (diluted 1:1000) (ThermoFisher Scientific). Macrophages and stain were incubated at 37 °C for 10  
639 minutes, then macrophages were washed twice in 1X PBS. 2 hours prior to infection, yeast cells were  
640 acclimated to RPMI 1640 (no phenol red, plus glutamine, ThermoFisher Scientific) at 37 °C prior to the  
641 infection. Yeast cells were then counted and seeded in a ratio of 1 *C. albicans* cell to 2 macrophage  
642 cells. Yeast and macrophages were then co-incubated at 37 °C (5% CO<sub>2</sub>). At the indicated time point,  
643 media was removed via aspiration, 1 ml of 1X TrypLE, no phenol red (ThermoFisher Scientific) was  
644 added to each well and incubated for 10 minutes. After vigorous manual pipetting, 2 wells for each time  
645 point were combined into one tube. Each time point was run in biological triplicate. Samples were then  
646 spun down at 37 °C, 300g for 10 minutes and resuspended in 1 ml PBS + 2% FCS and placed on ice  
647 until FACS. Unexposed controls for both species were collected as described above, not sorted and  
648 resuspended in 600 µl of buffer RLT (Qiagen) + 1% β-Mercaptoethanol (Sigma).

649

#### 650 **Fluorescence-activated cell sorting (FACS)**

651 Samples were sorted on the BDSORP FACS Aria running the BD FACSDIVA8.0 software into 1X PBS  
652 and then frozen at -80 until RNA extraction. Cells were sorted into the following sub populations: (i)  
653 macrophages infected with live *C. albicans* (GFP+, mCherry+, Deep red+), (ii) macrophages infected  
654 with dead *C. albicans* (GFP-, mCherry+, Deep red+), (iii) macrophages exposed to *C. albicans* (GFP-,  
655 mCherry-, Deep red+) and (iv) *C. albicans* exposed to macrophages (GFP+, mCherry+, Deep red-)  
656 Single cells were sorted into 5 ul of RLT 1% β-Mercaptoethanol in a 96 well plate (Eppendorf) and  
657 frozen at -80.

658

## 659 **RNA extraction, evaluation of RNA quality**

660 RNA was extracted from population samples using the Qiagen RNeasy mini kit. All samples were  
661 subjected to 3 minutes of bead beating with .5mm zirconia glass beads (BioSpec Products) in a bead  
662 mill. Single macrophages infected with *C. albicans* were directly lysed by sorting cells into a 96 well  
663 plate containing 5 ul of RLT (Qiagen) + 1%  $\beta$ -Mercaptoethanol (Sigma).

664

## 665 **cDNA synthesis and library generation**

666 For population samples, the RT reaction was carried out with the following program, as described<sup>46</sup>,  
667 with the addition of RNase inhibitor (ThermoFisher) at 40U/ul. cDNA was generated from single cells  
668 based on the Smart-seq2 method as described previously<sup>47</sup>, with the addition of RNase inhibitor was  
669 used at 40 U/ul (ThermoFisher) and 3.4 ul of 1 M trehalose was added to the RT reaction. All libraries  
670 were constructed using the Nextera XT DNA Sample Kit (Illumina) with custom indexed primers as  
671 described<sup>47</sup>. Infection subpopulation samples were sequenced on an Illumina Nextseq (37 x 38 cycles).  
672 *Candida* only samples were sequenced on an Illumina Miseq (75 x 75 cycles). Single infected cells  
673 were sequenced on Illumina's Nextseq (75x75 cycles).

674

## 675 **Read processing and transcript quantification of population-RNA-Seq**

676 Basic quality assessment of Illumina reads and sample demultiplexing was done with Picard version  
677 1.107 and Trimmomatic<sup>48</sup>. Samples profiling exclusively the mouse transcriptional response were  
678 aligned to the mouse transcriptome generated from the v. Dec. 2011 GRCm38/mm10 and a collection  
679 of mouse rRNA sequences from the UCSC genome website<sup>49</sup>. Samples profiling exclusively the yeast  
680 transcriptional response were aligned to the *Candida albicans* transcriptome strain SC5314 version  
681 A21-s02-m09-r10 downloaded from *Candida* Genome Database (<http://www.candidagenome.org>).

682

683 Samples from the infection assay profiling in parallel host and fungal transcriptomes, were aligned to a  
684 "composite transcriptome" made by combining the mouse transcriptome described above and the *C.*  
685 *albicans* transcriptome described above. To evaluate read mappings, BWA aln (BWA version 0.7.10-  
686 r789, <http://bio-bwa.sourceforge.net/>)<sup>50</sup> was used to align reads, and the 'XA tag' was used for read  
687 enumeration and separation of host and pathogen sequenced reads. Multi-reads (reads that aligned to  
688 both host and pathogen transcripts) were discarded, representing only an average of 2.6% of the  
689 sequenced reads. Then, each host or pathogen sample file were aligned to its corresponding reference  
690 using Bowtie2<sup>51</sup> and RSEM (RNA-Seq by expectation maximization; v.1.2.21). Transcript abundance  
691 was estimated using transcripts per million (TPM). Since parallel sequencing of host and pathogen from

692 single macrophages increased the complexity of transcripts measured compared to studies of only host  
693 cells alone, we detected lower number of transcripts of macrophages as compared with other studies  
694 using phagocytes and similar scRNA-seq methods<sup>14,15,30</sup>.

#### 695 696 **Differential gene expression analysis of population-RNA-Seq**

697 TMM-normalized 'transcripts per million transcripts' (TPM) for each transcript were calculated, and  
698 differentially expressed transcripts were identified using edgeR, all as implemented in the Trinity  
699 package version 2.1.1<sup>52</sup>. Genes were considered differentially expressed if they had a 4-fold change  
700 difference ( $> 4$  FC) in TPM values and a false discovery rate below or equal to 0.001 (FDR  $< 0.001$ ),  
701 unless specified otherwise.

#### 702 703 **Read processing and transcript quantification of single-cell RNA-Seq**

704 BAM files were converted to merged, demultiplexed FASTQ format using the Illumina Bcl2Fastq  
705 software package v2.17.1.14. For the RNA-Seq of sorted population samples, paired-end reads were  
706 mapped to the mouse transcriptome (GRCm38/mm10) or to the *Candida albicans* transcriptome strain  
707 SC5314 version A21-s02-m09-r10 using Bowtie2<sup>51</sup> and RSEM (RNA-Seq by expectation maximization;  
708 v.1.2.21)<sup>53</sup>. Transcript abundance was estimated using transcripts per million (TPM). For read mapping  
709 counts paired-reads were aligned to the 'composite reference' as described above.

710  
711 For each single macrophage infected with *C. albicans*, we quantified the number of genes for which at  
712 least one read was mapped (TPM  $> 1$ ). We filtered out low-quality macrophage or *C. albicans* cells from  
713 our data set based on a threshold for the number of genes detected (a minimum of 2,000 unique genes  
714 per cell for macrophages, and 600 unique genes per cell for *C. albicans*, and focused on those single  
715 infected macrophages that have good number of transcript detected in both host and pathogen (**Figure**  
716 **S9A**). For a given sample, we define the filtered gene set as the genes that have an expression level  
717 exceeding 10 TPM in at least 20% of the cells. After cell and gene filtering procedures, the expression  
718 matrix included 3,254 transcripts for the macrophages and 915 transcripts for *C. albicans*. To estimate  
719 the number of *C. albicans* in each macrophage, we measured the correlation of GFP levels from FACs  
720 with the total number of transcripts detected in live, phagocytosed *C. albicans* cells (at least 1 TPM) but  
721 found only a modest correlation between these two metrics ( $R^2 = 0.52$ ).

722  
723 To eliminate the non-biological associations of the samples based on plate based processing and  
724 amplification, single-cell expression matrices were log-transformed ( $\log(\text{TPM} + 1)$ ) for all downstream

725 analyses, most of which were performed using the R software package Seurat  
726 (<https://github.com/satijalab/seurat>). In addition, we do not find substantial differences in the number of  
727 sequenced reads and detected genes between samples. We separately analyzed two comparisons of  
728 macrophages-*C. albicans* cells: *i*) single macrophages infected - live phagocytosed *C. albicans* cells at  
729 2 and 4 hours (macrophages = 267; *C. albicans* cells = 215; macrophage-*C. albicans* = 156); and *ii*)  
730 macrophages infected and live or dead phagocytosed *C. albicans* cells at 4 hours (macrophages = 142;  
731 *C. albicans* cells = 71). These numbers of macrophages and *C. albicans* cells are the total that met the  
732 described QC filters.

733

#### 734 **Detection of variation across single, infected cells**

735 To examine if cell to cell variability existed across a wide range of population expression levels, we  
736 analyzed the variation and the intensity of non-unimodal distribution for each gene across single  
737 macrophages and *C. albicans* cells. Briefly, we determined the distribution of the average expression  
738 ( $\mu$ ), and the dispersion of expression ( $\sigma^2$ ; normalized coefficient of variation), placing each gene into  
739 bins, and then calculating a z-score for dispersion within each bin to control for the relationship between  
740 variability and average expression as implemented R package Seurat<sup>32</sup>.

741

#### 742 **Detection of variable genes and cell clustering**

743 To classify the single cell RNA-Seq from macrophages and *C. albicans*, the R package Seurat was  
744 used<sup>32</sup>. We first selected variable genes by fitting a generalized linear model to the relationship between  
745 the squared co-efficient of variation (CV) and the mean expression level in log/log space, and selecting  
746 genes that significantly deviated ( $p$ -value < 0.05) from the fitted curve, as implemented in Seurat, as  
747 previously described<sup>15</sup>. Then highly variable genes (CV > 1.25;  $p$ -value < 0.05) were used for principle  
748 component analysis (PCA), and statistically significant determined for each PC using JackStraw.  
749 Significant PCs ( $p$ -value < 0.05) were used for two-dimension t-distributed stochastic neighbor  
750 embedding (tSNE) to define subgroups of cells we denominated host-pathogen co-states. We identified  
751 differentially expressed genes (corrected- $p$  < 0.05) between co-states using a likelihood-ratio test (LRT)  
752 for single-cell differential expression<sup>33</sup> as implemented in Seurat.

753

#### 754 **Detection of differential expression distributions and bimodality**

755 To detect which genes have different expression distributions single infected macrophage and live *C.*  
756 *albicans* we compared the distributions of gene expression within single infected macrophage and live  
757 *C. albicans*, across and between 2 and 4 hours, and identified genes showing evidence of differential

758 distribution using a Bayesian modeling framework as implemented in scDD<sup>34</sup>. We used the permutation  
759 test of the Bayes Factor for independence of condition membership with clustering ( $n$  permutations =  
760 1000), and test for test for a difference in the proportion of zeroes (testZeroes=TRUE). A gene was  
761 considered differentially distributed using Benjamini-Hochberg adjusted  $p$ -values test ( $p$ -value < 0.05).

762

### 763 **Functional biological enrichment analyses**

764 For *C. albicans*, Gene ontology (GO) term analysis was performed in through the *Candida* Genome  
765 Database GO Term Finder and GO Slim Mapper (<http://www.candidagenome.org><sup>54</sup>). GO terms were  
766 considered significantly enriched in a cluster or set of genes if we found a GO term corrected  $p$ -value  
767 lower than 0.05 using hypergeometric distribution with Bonferroni correction

768

769 For macrophages, Ingenuity Pathway analysis (IPA) was performed. We investigated biological  
770 relationships, canonical pathways and Upstream Regulator analyses as part of IPA software. This  
771 allowed us to assess the overlap between significantly DEGs and an extensively curated database of  
772 target genes for each of several hundred known regulatory proteins. Clusters or set of genes were  
773 considered significantly enriched if we found enriched a  $-\log(p\text{-value})$  greater than 1.3 (*i.e.*  $p$ -value  $\leq$   
774 0.05) and z-score greater than 2 as recommended by the IPA software.

775

### 776 **Data availability statement**

777 All sequence data for this project has been deposited in the SRA under Bioproject PRJNA437988.  
778 Raw and processed data for gene expression analysis was deposited in the GEO under GSE111731.

779

780

### 781 **Acknowledgments**

782 We thank Aviv Regev and members of her lab for providing support for all the experimental work in this  
783 paper. We also thank Raktina Raychowdhury in Nir Hacohen's lab for help with preparation of the  
784 primary BMDM cells and Anh Hoang, Mehment Toner, and Daniel Irima for providing microwells. This  
785 project has been funded in whole or in part with Federal funds from the National Institute of Allergy and  
786 Infectious Diseases, National Institutes of Health, Department of Health and Human Services, under  
787 award N°: U19AI110818. CBF was supported by a Helen Hay Whitney postdoctoral fellowship, TD was  
788 supported by NIAID and WPI.

789

### 790 **Author Contributions**



791 CBF, DAT, RPR, and CAC designed the study. TD, CBF and BYL carried out experiments. JFM  
792 analyzed the data and prepared figures and tables. JFM, TD, RPR and CAC wrote the initial draft of the  
793 manuscript, which was revised with input from all authors. All authors read and approved final  
794 manuscript.

795  
796 **Additional information**  
797 Competing interests: The authors declare no competing interests.

798

799 **Figures**

800

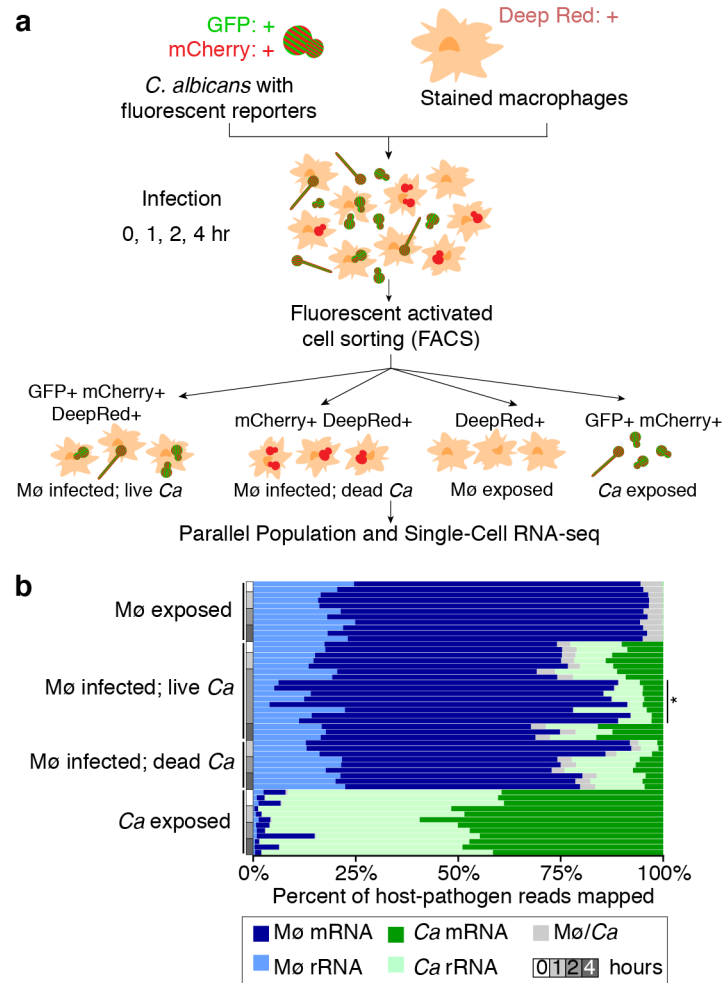

801

802 **Figure 1. Heterogeneous populations of macrophage-*Candida* encounters are captured by cell**  
 803 **sorting sequencing and expression analysis. (a)** Schematic representation of the experimental  
 804 model, using primary, bone marrow-derived macrophages (BMDMs) incubated with *Candida albicans*  
 805 reporter strain SC5314-mCherry-GFP, sampling at time intervals, and sorting to separate  
 806 subpopulations of interacting cells. **(b)** Percent of host (*Mø*: macrophages) and pathogen (*Ca*: *C.*  
 807 *albicans*) RNA-Seq reads mapped to the composite reference transcriptome, including mouse  
 808 (GRCm38/mm10; mRNA and rRNA transcripts) and *Candida albicans* (SC5314; mRNA and rRNA  
 809 transcripts). *Mø/Ca* (gray color label) is the proportion of multiple mapped reads, *i.e.* reads that map to  
 810 both the mouse and *C. albicans* transcriptomes, which were excluded from further analysis.

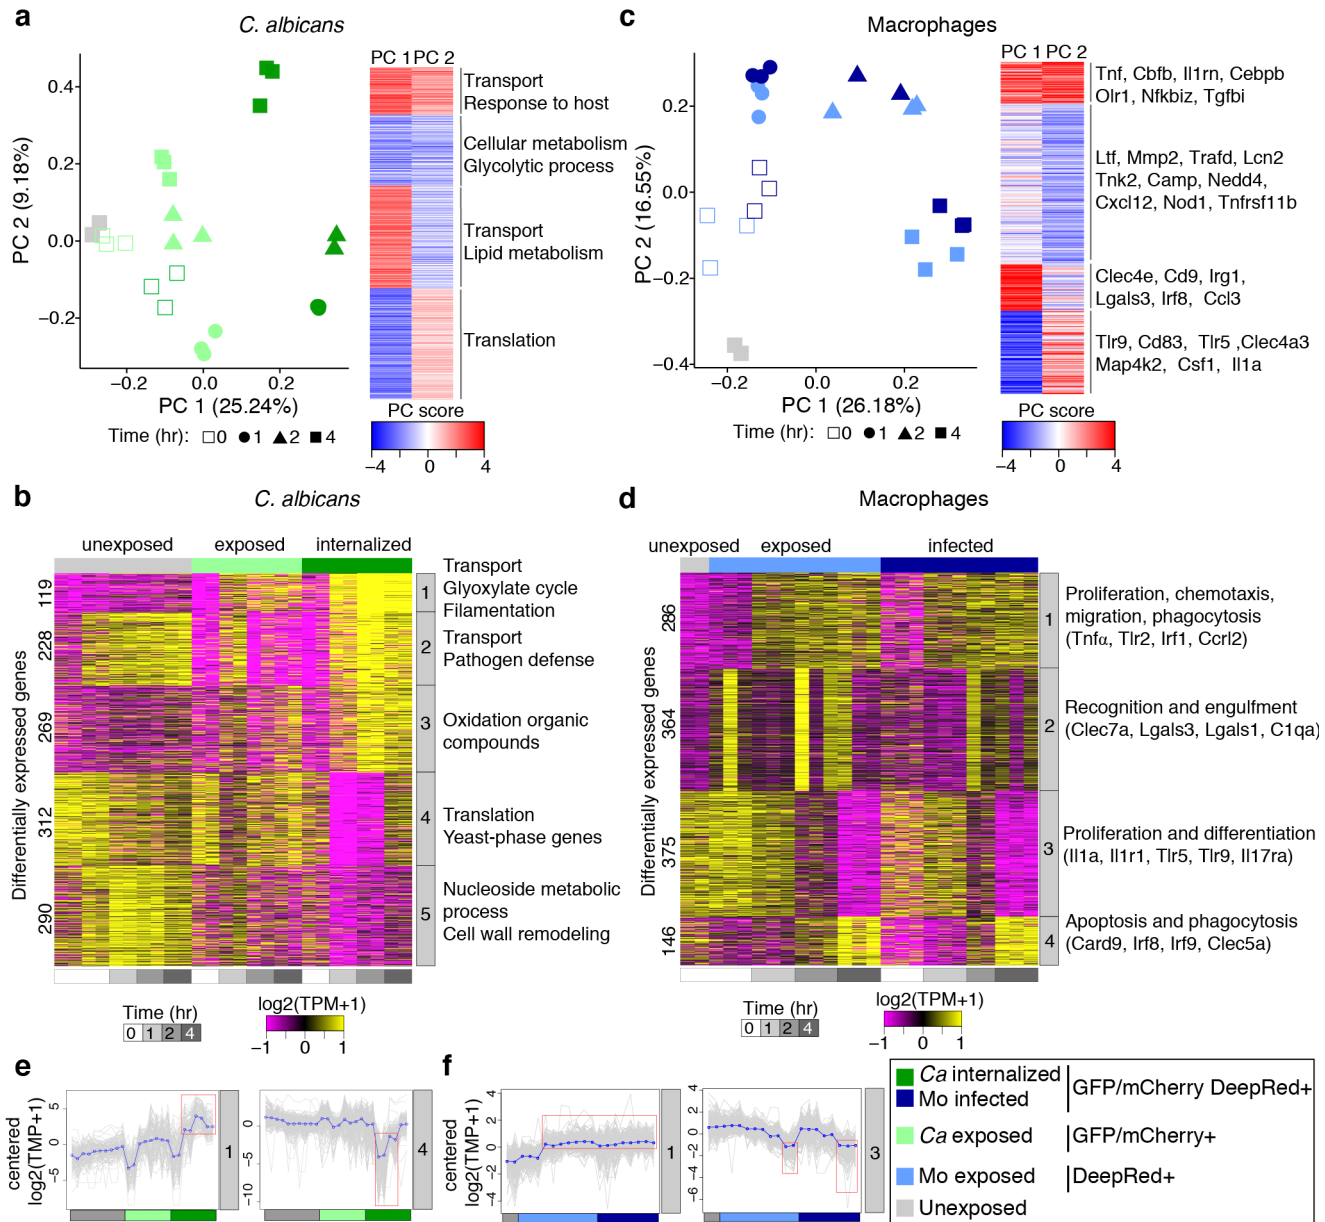

811

812 **Figure 2. Subpopulations of infection outcome reveal dynamic parallel host-pathogen**  
 813 **orchestration of transcriptional response.** Principal component analysis (PCA) using the transcript  
 814 abundance for the pathogen (a; *C. albicans*) and the host (c; macrophages) using significantly  
 815 differentially expressed genes (DEGs; FC >4, FDR < 0.001) in live *C. albicans*-phagocytized  
 816 macrophages (GFP+ mCherry+ Deep Red+) compared to all other conditions. Contributions of each  
 817 infection outcome replicate (points) to the first two principal components (PC1 and PC2) are depicted.  
 818 The projection score (red: high; blue: low) for each gene (row) onto PC1 and PC2 revealed four clusters  
 819 in both host and pathogen. For each projection score cluster, immune response genes (macrophages)  
 820 and functional biological categories (*C. albicans*; deduced from GO term enrichment analysis) are  
 821 shown. (b) Transcriptional response in subpopulations of *Candida albicans*. Heatmap depicts  
 822 significantly differentially expressed genes for replicates of each *C. albicans* sorted populations  
 823 (unexposed, exposed and phagocytosed) at 0, 1, 2 and 4 hours post-infection, grouped by *k-means*  
 824 (similar expression patterns) in five clusters. Each cluster includes synthesized functional biological

825 relationships using Gene Ontology (GO) terms (corrected  $P < 0.05$ ). **(d)** Transcriptional response in  
826 subpopulations of macrophages. Heatmap depicts significantly differentially expressed genes (DEGs;  
827  $FC > 4$ ,  $FDR < 0.001$ ) for replicates of each macrophage-sorted populations (unexposed, exposed and  
828 infected) at 0, 1, 2 and 4 hours post-infection, clustered by *k-means* (similar expression patterns). Each  
829 cluster includes synthesized functional biological relationships using IPA terms ( $-\log(p\text{-value}) > 1.3$ ;  $z\text{-}$   
830  $\text{score} > 2$ ). Expression patterns for **(f)** clusters 1 and 4 in *C. albicans* and **(g)** cluster 1 and 3 in  
831 macrophages. Each gene is plotted (gray) in addition to the mean expression profile for that cluster  
832 (blue).  
833

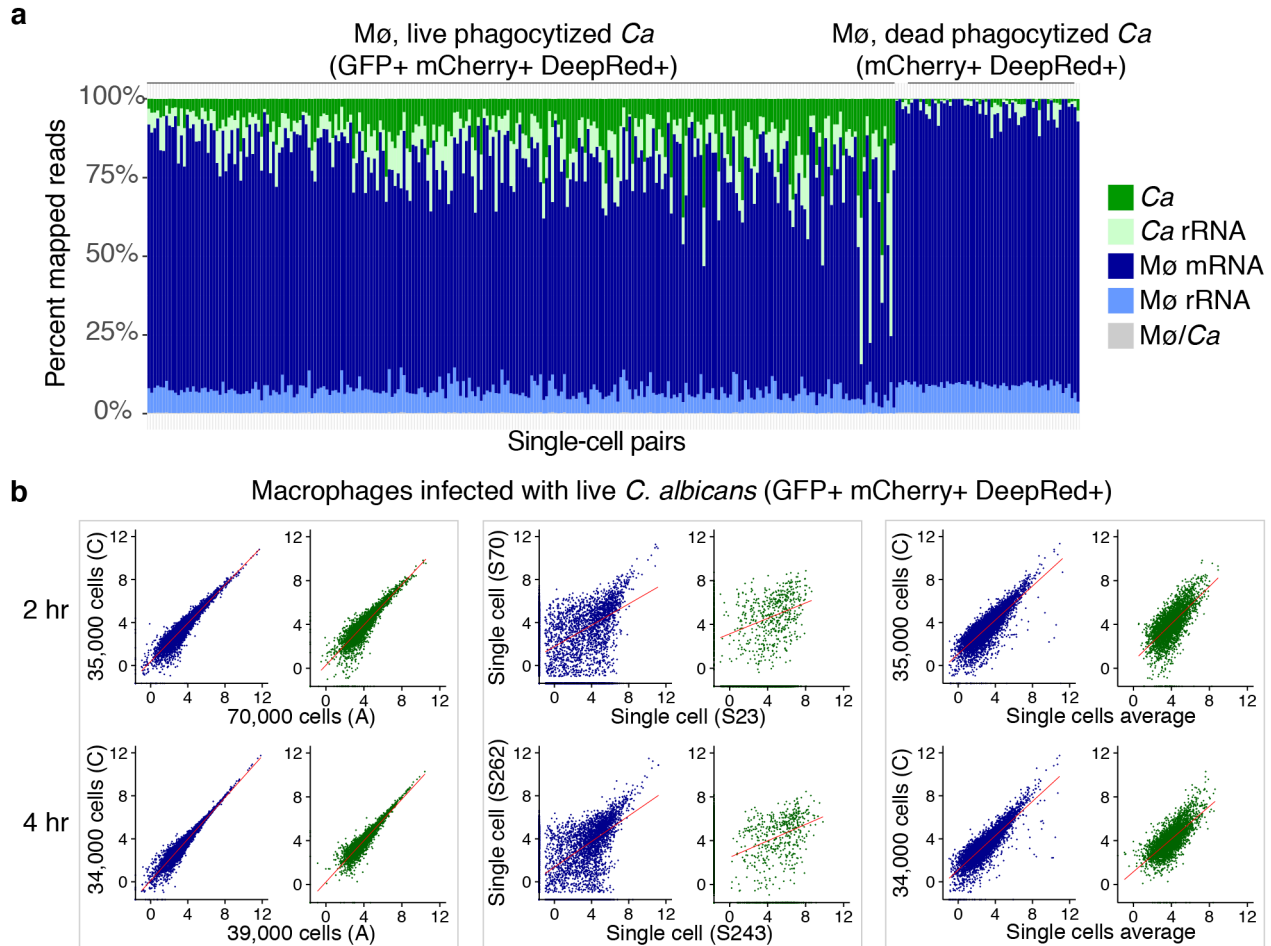

834

835 **Figure 3. Processing and evaluation of parallel host-pathogen single-cell RNA-seq.** (a) Plot of the  
836 percent of mapped reads to the composite reference transcriptome (mouse messenger and ribosomal  
837 RNA + *Candida albicans* messenger and ribosomal RNA collections) of 314 single macrophages with  
838 live (mCherry + GFP+) or dead (mCherry + GFP-) phagocytosed *C. albicans* cells. (b) Plots of the gene  
839 expression correlation between (left) two replicates of the sorted subpopulation of macrophages (blue)  
840 with phagocytosed live *C. albicans* (green) at 2 and 4 hours post-infection; (middle) between two single  
841 macrophages and two phagocytosed *C. albicans*, and (right) between the single cells expression  
842 average and one replicate of the population.  
843

843

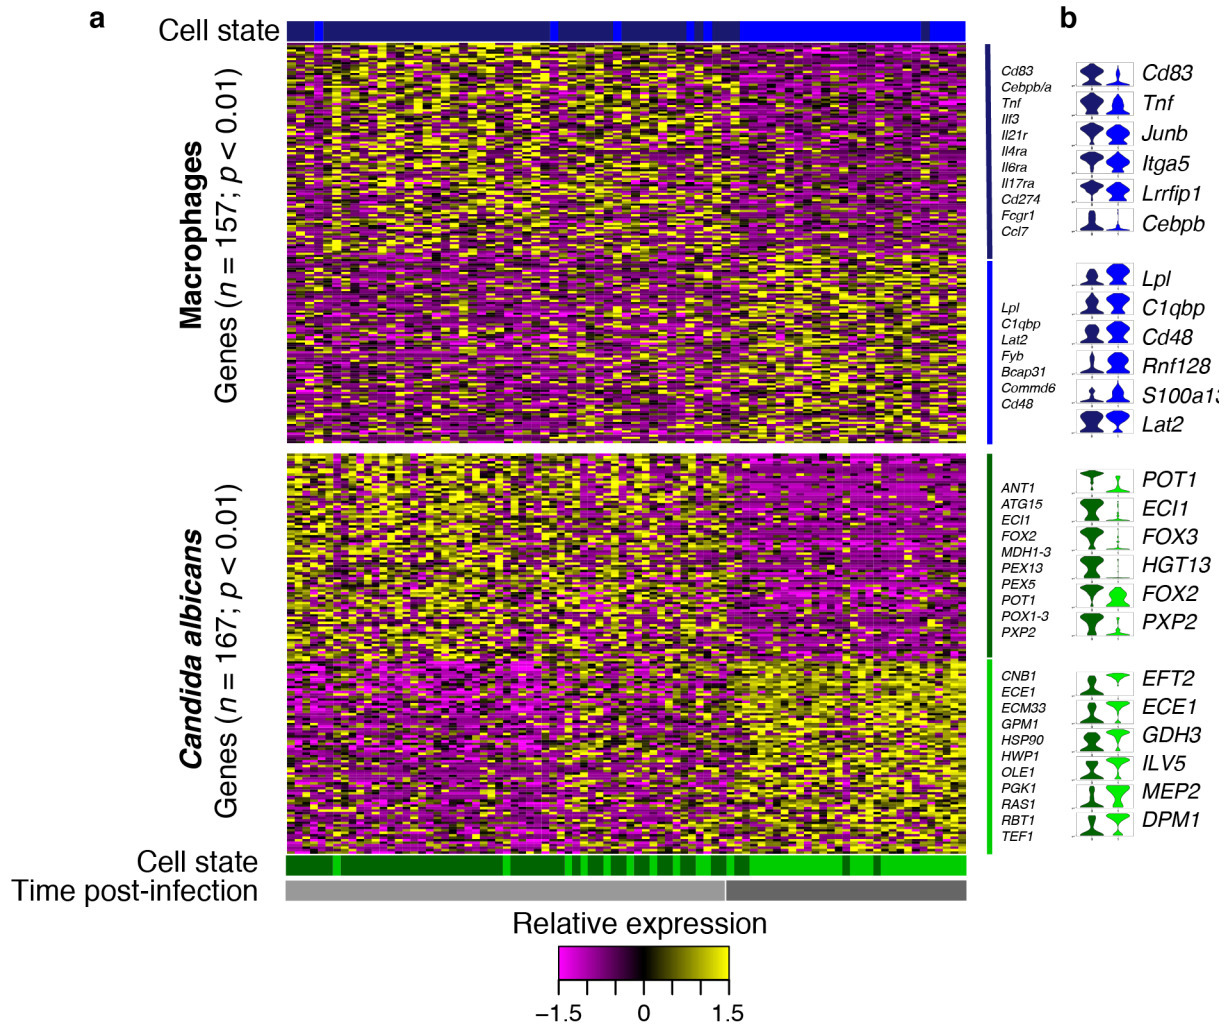

844

845 **Figure 4. Parallel host-pathogen single-cell RNA-seq profiling reveals infection outcome shifts**  
 846 **in pro-inflammatory response and pathogen immune evasion. (a)** Heat maps report parallel scaled  
 847 expression [log TPM (transcripts per million) +1 values] of differentially expressed genes for each co-  
 848 state of macrophages infected with live *C. albicans*. Each column represents transcriptional signal from  
 849 a single, infected macrophage and the *C. albicans* inside of it. (Top: macrophage response; bottom: *C.*  
 850 *albicans* response). Color scheme of gene expression is based on z-score distribution from -1.5  
 851 (purple) to 1.5 (yellow). Bottom and right margin color bars in each heat-map highlight co-state 1 (dark  
 852 blue in macrophages, and dark green in *C. albicans*) and co-state 2 (blue in macrophages, and green in  
 853 *C. albicans*), and time post-infection 2 hours (gray) and 4 hours (dark gray). **(b)** Violin plots at right  
 854 illustrate expression distribution of a subset six differentially expressed immune response or immune  
 855 evasion genes for each co-state in macrophages and *C. albicans*, respectively.

856

857

858 **References**

- 859 1. Brown, G. D. Innate antifungal immunity: the key role of phagocytes. *Annu. Rev. Immunol.* **29**, 1–  
860 21 (2011).
- 861 2. Huffnagle, G. B. & Noverr, M. C. The emerging world of the fungal microbiome. *Trends Microbiol.*  
862 **21**, 334–341 (2013).
- 863 3. Lorenz, M. C., Bender, J. A. & Fink, G. R. Transcriptional response of *Candida albicans* upon  
864 internalization by macrophages. *Eukaryot. Cell* **3**, 1076–1087 (2004).
- 865 4. Frohner, I. E., Bourgeois, C., Yatsyk, K., Majer, O. & Kuchler, K. *Candida albicans* cell surface  
866 superoxide dismutases degrade host-derived reactive oxygen species to escape innate immune  
867 surveillance. *Mol. Microbiol.* **71**, 240–252 (2009).
- 868 5. Seider, K., Heyken, A., Lüttich, A., Miramón, P. & Hube, B. Interaction of pathogenic yeasts with  
869 phagocytes: survival, persistence and escape. *Curr. Opin. Microbiol.* **13**, 392–400 (2010).
- 870 6. Smekens, S. P. *et al.* Functional genomics identifies type i interferon pathway as central for host  
871 defense against *Candida albicans*. *Nat. Commun.* **4**, (2013).
- 872 7. Quintin, J. *et al.* *Candida albicans* infection affords protection against reinfection via functional  
873 reprogramming of monocytes. *Cell Host Microbe* **12**, 223–232 (2012).
- 874 8. Hebecker, B. *et al.* Dual-species transcriptional profiling during systemic candidiasis reveals  
875 organ-specific host-pathogen interactions. *Sci Rep* **6**, 36055 (2016).
- 876 9. Liu, Y. *et al.* New signaling pathways govern the host response to *C. albicans* infection in various  
877 niches. *Genome Res.* **125**, 679–689 (2015).
- 878 10. Niemiec, M. J. *et al.* Dual transcriptome of the immediate neutrophil and *Candida albicans*  
879 interplay. *BMC Genomics* **18**, 696 (2017).
- 880 11. Tierney, L. *et al.* An interspecies regulatory network inferred from simultaneous RNA-seq of  
881 *Candida albicans* invading innate immune cells. *Front. Microbiol.* **3**, 1–14 (2012).
- 882 12. Erwig, L. P. & Gow, N. a. R. Interactions of fungal pathogens with phagocytes. *Nat. Rev.*  
883 *Microbiol.* **14**, 163–176 (2016).
- 884 13. Shalek, A. K. *et al.* Single-cell transcriptomics reveals bimodality in expression and splicing in  
885 immune cells. *Nature* **498**, 236–40 (2013).
- 886 14. Avraham, R. *et al.* Pathogen Cell-to-Cell Variability Drives Heterogeneity in Host Immune  
887 Responses. *Cell* **162**, 1309–1321 (2015).
- 888 15. Saliba, A.-E. *et al.* Single-cell RNA-seq ties macrophage polarization to growth rate of  
889 intracellular *Salmonella*. *Nat. Microbiol.* **2**, 16206 (2016).
- 890 16. Avital, G. *et al.* scDual-Seq: mapping the gene regulatory program of *Salmonella* infection by

- 891 host and pathogen single-cell RNA-sequencing. *Genome Biol.* **18**, 200 (2017).
- 892 17. Martin, R. *et al.* A core filamentation response network in *Candida albicans* is restricted to eight  
893 genes. *PLoS One* **8**, e58613 (2013).
- 894 18. Murad, A. M. A. *et al.* Transcript profiling in *Candida albicans* reveals new cellular functions for  
895 the transcriptional repressors CaTup1, CaMig1 and CaNrg1. *Mol. Microbiol.* **42**, 981–993 (2001).
- 896 19. Braun, B. R. & Johnson, A. D. Control of filament formation in *Candida albicans* by the  
897 transcriptional repressor TUP1. *Science (80-. )*. **277**, 105–109 (1997).
- 898 20. Hwang, C.-S., Oh, J.-H., Huh, W.-K., Yim, H.-S. & Kang, S.-O. Ssn6, an important factor of  
899 morphological conversion and virulence in *Candida albicans*. *Mol. Microbiol.* **47**, 1029–1043  
900 (2003).
- 901 21. Ryan, O. *et al.* Global Gene Deletion Analysis Exploring Yeast Filamentous Growth. *Science (80-*  
902 *.)*. **337**, 1353–1356 (2012).
- 903 22. O'Meara, T. R. *et al.* Global analysis of fungal morphology exposes mechanisms of host cell  
904 escape. *Nat. Commun.* **6**, 6741 (2015).
- 905 23. Huang, G. *et al.* Bistable expression of WOR1, a master regulator of white-opaque switching in  
906 *Candida albicans*. *Proc. Natl. Acad. Sci. U. S. A.* **103**, 12813–8 (2006).
- 907 24. Zordan, R. E., Miller, M. G., Galgoczy, D. J., Tuch, B. B. & Johnson, A. D. Interlocking  
908 Transcriptional Feedback Loops Control White-Opaque Switching in *Candida albicans*. *PLoS*  
909 *Biol.* **5**, e256 (2007).
- 910 25. Pande, K., Chen, C. & Noble, S. M. Passage through the mammalian gut triggers a phenotypic  
911 switch that promotes *Candida albicans* commensalism. *Nat. Genet.* **45**, 1088–1091 (2013).
- 912 26. Fradin, C. *et al.* Stage-specific gene expression of *Candida albicans* in human blood. *Mol.*  
913 *Microbiol.* **47**, 1523–1543 (2003).
- 914 27. Fradin, C. *et al.* Granulocytes govern the transcriptional response, morphology and proliferation  
915 of *Candida albicans* in human blood. *Mol. Microbiol.* **56**, 397–415 (2005).
- 916 28. Bruno, V. M. *et al.* Transcriptomic Analysis of Vulvovaginal Candidiasis Identifies a Role for the  
917 NLRP3 Inflammasome. *MBio* **6**, e00182-15 (2015).
- 918 29. Liu, Y. *et al.* New signaling pathways govern the host response to *C. albicans* infection in various  
919 niches. *Genome Res* **25**, 679–89 (2015).
- 920 30. Shalek, A. K. *et al.* Single-cell RNA-seq reveals dynamic paracrine control of cellular variation.  
921 *Nature* **510**, 363–9 (2014).
- 922 31. Van Der Maaten, L. J. P. & Hinton, G. E. Visualizing high-dimensional data using t-sne. *J. Mach.*  
923 *Learn. Res.* **9**, 2579–2605 (2008).



- 924 32. Macosko, E. Z. *et al.* Highly Parallel Genome-wide Expression Profiling of Individual Cells Using  
925 Nanoliter Droplets. *Cell* **161**, 1202–1214 (2015).
- 926 33. McDavid, A. *et al.* Data exploration, quality control and testing in single-cell qPCR-based gene  
927 expression experiments. *Bioinformatics* **29**, 461–467 (2013).
- 928 34. Korthauer, K. D. *et al.* A statistical approach for identifying differential distributions in single-cell  
929 RNA-seq experiments. *Genome Biol.* **17**, 222 (2016).
- 930 35. Jouault, T. *et al.* Host responses to a versatile commensal: PAMPs and PRRs interplay leading  
931 to tolerance or infection by *Candida albicans*. *Cell. Microbiol.* **11**, 1007–15 (2009).
- 932 36. Reales-Calderón, J. A., Aguilera-Montilla, N., Corbí, Á. L., Molero, G. & Gil, C. Proteomic  
933 characterization of human proinflammatory M1 and anti-inflammatory M2 macrophages and their  
934 response to *Candida albicans*. *Proteomics* **14**, 1503–1518 (2014).
- 935 37. Bain, J. M. *et al.* *Candida albicans* Hypha Formation and Mannan Masking of  $\beta$ -Glucan Inhibit  
936 Macrophage Phagosome Maturation. *MBio* **5**, e01874-14 (2014).
- 937 38. Wellington, M., Koselny, K., Sutterwala, F. S. & Krysan, D. J. *Candida albicans* triggers NLRP3-  
938 mediated pyroptosis in macrophages. *Eukaryot. Cell* **13**, 329–340 (2014).
- 939 39. de Jong, I. G., Haccou, P. & Kuipers, O. P. Bet hedging or not? A guide to proper classification of  
940 microbial survival strategies. *BioEssays* **33**, 215–223 (2011).
- 941 40. Lewis, K. Persister Cells. *Annu. Rev. Microbiol.* **64**, 357–372 (2010).
- 942 41. Gerami-Nejad, M., Zacchi, L. F., McClellan, M., Matter, K. & Berman, J. Shuttle vectors for facile  
943 gap repair cloning and integration into a neutral locus in *Candida albicans*. *Microbiol. (United*  
944 *Kingdom)* **159**, 565–579 (2013).
- 945 42. Safonova, Y., Bankevich, A. & Pevzner, P. A. in 265–279 (Springer, Cham, 2014).  
946 doi:10.1007/978-3-319-05269-4\_21
- 947 43. Altschul, S. F. *et al.* Gapped BLAST and PSI-BLAST: a new generation of protein database  
948 search programs. *Nucleic Acids Res.* **25**, 3389–402 (1997).
- 949 44. Thorvaldsdóttir, H., Robinson, J. T. & Mesirov, J. P. Integrative Genomics Viewer (IGV): high-  
950 performance genomics data visualization and exploration. *Brief. Bioinform.* **14**, 178–92 (2013).
- 951 45. Stubbs, M. *et al.* MLL-AF9 and FLT3 cooperation in acute myelogenous leukemia: development  
952 of a model for rapid therapeutic assessment. *Leukemia* **22**, 66–77 (2008).
- 953 46. Satija, R., Farrell, J. A., Gennert, D., Schier, A. F. & Regev, A. Spatial reconstruction of single-  
954 cell gene expression data. **33**, (2015).
- 955 47. Villani, A.-C. *et al.* Single-cell RNA-seq reveals new types of human blood dendritic cells,  
956 monocytes, and progenitors. *Science (80- )*. **356**, (2017).

- 957 48. Bolger, A. M., Lohse, M. & Usadel, B. Trimmomatic: a flexible trimmer for Illumina sequence  
958 data. *Bioinformatics* **30**, 2114–2120 (2014).
- 959 49. Karolchik, D. *et al.* The UCSC Table Browser data retrieval tool. *Nucleic Acids Res.* **32**, 493D–  
960 496 (2004).
- 961 50. Li, H. & Durbin, R. Fast and accurate long-read alignment with Burrows-Wheeler transform.  
962 *Bioinformatics* **26**, 589–95 (2010).
- 963 51. Langmead, B. & Salzberg, S. L. Fast gapped-read alignment with Bowtie 2. *Nat. Methods* **9**,  
964 357–359 (2012).
- 965 52. Haas, B. J. *et al.* De novo transcript sequence reconstruction from RNA-seq using the Trinity  
966 platform for reference generation and analysis. *Nat Protoc* **8**, 1494–512 (2013).
- 967 53. Li, B. & Dewey, C. N. RSEM: accurate transcript quantification from RNA-Seq data with or  
968 without a reference genome. *BMC Bioinformatics* **12**, 323 (2011).
- 969 54. Inglis, D. O. *et al.* The *Candida* genome database incorporates multiple *Candida* species:  
970 multispecies search and analysis tools with curated gene and protein information for *Candida*  
971 *albicans* and *Candida glabrata*. *Nucleic Acids Res.* **40**, D667–D674 (2012).  
972
